# Supplementary material for: A synthetic method to assay polycystin channel biophysics
Source: eLife journal article supplement (doi:10.7554/elife.98534), 2024-07-10
Supplement: fig1-data2 [file elife-98534-fig1-data2-v1.zip]

## Western blot

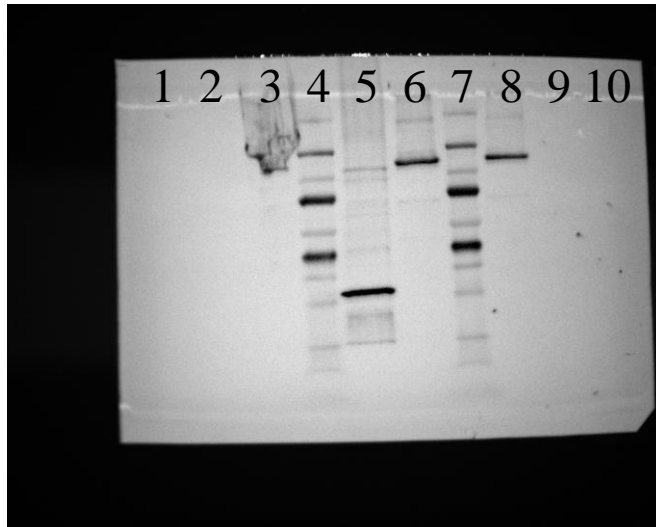

### Wells

1. Empty
2. Empty
3. PKD2L1-GFP 15 $\mu$ l
4. SPECTRA protein ladder
5. GFP 3 $\mu$ l
6. PKD2L1-GFP 7 $\mu$ l
7. SPECTRA protein ladder
8. PKD2L1-GFP 5 $\mu$ l
9. Empty
10. Empty
